# Supplementary material
Source: HighWire-hosted journal article supplement (https://qualitysafety.bmj.com/content/29/6/465)
Supplement: inline-supplementary-material-2 [file inline-supplementary-material-2.pdf]

**Supplementary Table 2.** Shows the total number of patients admitted for each shift hour, the number of patients admitted, and the proportion of the patients seen who were admitted.

| Number of Patient Seen and Admitted by Shift Hour |                         |                      |                     |
|---------------------------------------------------|-------------------------|----------------------|---------------------|
| Hour of Shift                                     | Number of Patients Seen | Number of Admissions | Proportion Admitted |
| 1                                                 | 54560                   | 20764                | 38.1%               |
| 2                                                 | 43672                   | 16326                | 37.4%               |
| 3                                                 | 39789                   | 15181                | 38.2%               |
| 4                                                 | 40121                   | 15914                | 39.7%               |
| 5                                                 | 39243                   | 15435                | 39.3%               |
| 6                                                 | 34424                   | 14187                | 41.2%               |
| 7                                                 | 26419                   | 11105                | 42.0%               |
| 8                                                 | 12749                   | 5098                 | 40.0%               |
| 9                                                 | 2940                    | 1186                 | 40.3%               |
