# Supplementary material
Source: HighWire-hosted journal article supplement (https://qualitysafety.bmj.com/content/29/6/465)
Supplement: inline-supplementary-material-3 [file inline-supplementary-material-3.pdf]

1 **Supplementary Table 1** – Results of generalized estimating equation showing the primary exposure (main predictors) of last hour of shift, last  
 2 quarter of shift, and shift hour relative to the first hour, stratified by three ESI levels (1, 2-3, and 4-5). Reference categories: main predictors = first *n*  
 3 hours, first quarter of shift, or first hour; age, N/A; gender, male; 24-hour clock, N/A; ESI, N/A. ESI = emergency severity index. 95% CI = 95%  
 4 confidence interval.

Stratified Results from Generalized Estimating Equation with log link and exchangeable correlation structure\* predicting probability of admission from ER.

|                |                               | ESI 1                |               | ESI 2-3       |               | ESI 4-5       |               |
|----------------|-------------------------------|----------------------|---------------|---------------|---------------|---------------|---------------|
|                |                               | Relative Risk        | 95% CI        | Relative Risk | 95% CI        | Relative Risk | 95% CI        |
| <b>Model 1</b> |                               | <b>Shift hour</b>    |               |               |               |               |               |
|                | First <i>n</i> hours of shift | 1.00 (ref)           | (ref)         | 1.00 (ref)    | (ref)         | 1.00 (ref)    | (ref)         |
|                | Last hour of shift            | 1.034                | (0.998-1.072) | 1.065         | (1.028-1.103) | 1.62          | (0.996-2.635) |
|                | <b>Age</b>                    | 1.01                 | (1.01-1.011)  | 1.021         | (1.021-1.022) | 1.038         | (1.034-1.043) |
|                | <b>Sex</b>                    |                      |               |               |               |               |               |
|                | Male                          | 1.00 (ref)           | (ref)         | 1.00 (ref)    | (ref)         | 1.00 (ref)    | (ref)         |
|                | Female                        | 0.909                | (0.897-0.922) | 0.895         | (0.886-0.903) | 0.986         | (0.821-1.183) |
|                | <b>24 Hour clock</b>          | 0.998                | (0.997-1)     | 1.005         | (1.004-1.006) | 0.998         | (0.983-1.013) |
| <b>Model 2</b> |                               | <b>Shift quarter</b> |               |               |               |               |               |
|                | First three quarters          | 1.00 (ref)           | (ref)         | 1.00 (ref)    | (ref)         | 1.00 (ref)    | (ref)         |
|                | Last quarter of shift         | 1.026                | (1.011-1.042) | 1.034         | (1.022-1.047) | 1.236         | (0.996-1.535) |
|                | <b>Age</b>                    | 1.01                 | (1.01-1.011)  | 1.021         | (1.021-1.022) | 1.038         | (1.034-1.043) |
|                | <b>Sex</b>                    |                      |               |               |               |               |               |
|                | Male                          | 1.00 (ref)           | (ref)         | 1.00 (ref)    | (ref)         | 1.00 (ref)    | (ref)         |
|                | Female                        | 0.909                | (0.897-0.922) | 0.895         | (0.887-0.903) | 0.987         | (0.822-1.185) |
|                | <b>24 Hour clock</b>          | 0.998                | (0.997-0.999) | 1.005         | (1.004-1.005) | 0.996         | (0.981-1.011) |
| <b>Model 3</b> |                               | <b>Shift hour</b>    |               |               |               |               |               |
|                | Hour 1                        | 1.00 (ref)           | (ref)         | 1.00 (ref)    | (ref)         | 1.00 (ref)    | (ref)         |
|                | Hour 2                        | 1.017                | (0.989-1.045) | 0.985         | (0.969-1.002) | 0.994         | (0.728-1.355) |
|                | Hour 3                        | 1.01                 | (0.982-1.038) | 1.018         | (1-1.035)     | 0.911         | (0.654-1.27)  |
|                | Hour 4                        | 1.003                | (0.975-1.031) | 1.049         | (1.031-1.066) | 0.996         | (0.718-1.381) |
|                | Hour 5                        | 0.997                | (0.969-1.025) | 1.031         | (1.014-1.049) | 1.204         | (0.869-1.669) |
|                | Hour 6                        | 1.042                | (1.014-1.071) | 1.059         | (1.04-1.077)  | 1.076         | (0.757-1.531) |
|                | Hour 7                        | 1.031                | (1.002-1.061) | 1.052         | (1.032-1.072) | 1.236         | (0.848-1.8)   |
|                | Hour 8                        | 1.051                | (1.014-1.09)  | 1.043         | (1.016-1.071) | 1.63          | (1.072-2.479) |
|                | Hour 9                        | 1.108                | (1.05-1.168)  | 1.071         | (1.016-1.13)  | 1.36          | (0.662-2.793) |
|                | <b>Age</b>                    | 1.01                 | (1.01-1.011)  | 1.022         | (1.021-1.022) | 1.038         | (1.034-1.043) |
|                | <b>Sex</b>                    |                      |               |               |               |               |               |
|                | Male                          | 1.00 (ref)           | (ref)         | 1.00 (ref)    | (ref)         | 1.00 (ref)    | (ref)         |
|                | Female                        | 0.91                 | (0.897-0.923) | 0.895         | (0.887-0.904) | 0.99          | (0.825-1.189) |
|                | <b>24 Hour clock</b>          | 0.998                | (0.997-0.999) | 1.005         | (1.004-1.006) | 0.996         | (0.981-1.011) |

Note:

\*Physician used as clustering level
